# Supplementary material
Source: publisher figshare collection journal article supplement (https://karger.figshare.com/ndownloader/files/13192829)
Supplement: Supplementary file 1 [file 13192829]

**Supplementary Table E1:**

Interreader reliability of two readers regarding imaging diagnosis. The coefficients are given in total as well as separately for CT and MRI. Observer agreement is given using the graduation by Landis and Koch [19]: < 0 = poor agreement, 0 – 0.20 = slight agreement, 0.21 -0.40 = fair agreement, 0.41 - 0.60 = moderate agreement, 0.61 - 0.80 = substantial agreement, 0.81 - 1.00 = (almost) perfect agreement. Benchmarks for Spearman rank correlation were used as follows: 0.00 - 0.20, 0.21 - 0.50, 0.51 - 0.80, and 0.81 - 1.0 indicating no, weak, moderate, and strong relationship, respectively.

| **Feature** | **Spearman total** | **Cohen‘s Kappa total** | **Spearman CT** | **Cohen‘s Kappa**  **CT** | **Spearman MRI** | **Cohen‘s**  **Kappa**  **MRI** |
| --- | --- | --- | --- | --- | --- | --- |
| Double aortic arch (DAA) | 0.802 | 0.783 | 0.868 | 0.859 | 0.760 | 0.733 |
| Interruption of aortic arch | 0.742 | 0.625 | 0.783 | 0.629 | 0.713 | 0.619 |
| Signs for ductus ligament | 0.514 | 0.548 | 0.354 | 0.419 | 0.604 | 0.569 |
| Aberrant pulmonary artery | 1.000 | 1.000 | 1.000 | 1.000 | 1.000 | 1.000 |
| Tracheal compression | 0.964 | 0.963 | 1.000 | 1.000 | 0.943 | 0.942 |
| Quadrant of tracheal compression | 0.792 | 0.630 | 0.970 | 0.875 | 0.726 | 0.554 |
| Esophageal compression | 0.865 | 0.865 | 1.000 | 1.000 | 0.784 | 0.784 |
| Localisation of esophageal compression | 0.896 | 0.909 | 1.000 | 1.000 | 0.836 | 0.854 |
